# Supplementary material for: Modulation of the splicing regulatory function of SRSF10 by a novel compound that impairs HIV-1 replication
Source: PubMed Central journal article supplement (PMC5397194; doi:10.1093/nar/gkw1223), 2016-12-07

## 1 **SUPPLEMENTARY INFORMATION**

2

### 3 **Supplementary Figure S1. Effect of 1C8 on viral RNA levels in the 24NLESG cell** 4 **line.**

5 Schematic of HIV-1 provirus in the 24NLESG cell line is shown on top. HIV-1 was  
6 induced in 24NLESG cells by addition of PMA in the presence of DMSO or 10  $\mu$ M 1C8.  
7 After 24 h, cells were harvested and total RNA extracted. HIV-1 unspliced (US) RNA  
8 levels were assayed using the Aurum Total RNA Lysis Kit (Bio-Rad), as per  
9 manufacturer's instructions with the addition of Turbo DNase (Ambion). Purified RNA  
10 (0.5-2  $\mu$ g) was reverse transcribed using M-MLV (Invitrogen). HIV-1 and actin mRNA  
11 levels in DMSO- and compound-treated samples were quantified by qPCR using the  
12 Mastercycler ep realplex (Eppendorf). Gene quantification was evaluated using the  
13 absolute quantification method, normalized to  $\beta$ -actin expression, and expressed relative  
14 to DMSO treatment.

15

### 16 **Supplementary Figure S2. 1C8 does not affect hTRA2 $\beta$ and hnRNP F protein** 17 **expression.**

18 Western blot analysis of HeLa-HIV cells treated with different concentrations of 1C8.  
19 Protein extracts were fractionated by SDS-PAGE and transferred to a nitrocellulose  
20 membrane that was decorated with anti-hTRA2 $\beta$  and hnRNP F antibodies.

21

### 22 **Supplementary Figure S3. RT-PCR analysis of splicing changes induced by 1C8.**

23 Scatter plot comparing the percent splicing index (PSI) for 96 alternative splicing events  
24 in HeLa-HIV cells treated (*y*-axis) or not (*x*-axis) with 10  $\mu$ M of 1C8. Values were  
25 obtained by quantitating amplification products obtained endpoint RT-PCR and  
26 fractionated on a Caliper LC-90 automated microfluidic station. Each point represents an  
27 average of triplicates with standard variations shown. Diagonals that run parallel to the  
28 central diagonal depict a  $\pm$  10% PSI window. *q*-values for the 1C8-induced difference  
29 are shown in Supplementary Table S1. The red dot represents the only splicing event  
30 (*INF2*) that is shifted with a *q*-value  $\leq$  0.01. White dots represent events with *q*-values  $\leq$   
31 0.05 as listed in Supplementary Table S1.

32

### 33 **Supplementary Figure S4. RNA-Seq analysis of splicing changes induced by 1C8.**

34 Scatter plot comparing the percent splicing index (PSI) of more than 62 000 alternative  
35 splicing events in HeLa-HIV cells not treated (*x*-axis) or treated (*y*-axis) with 1, 5, 10 and  
36 20  $\mu$ M of 1C8. Diagonals that run parallel to the central diagonal depict a  $\pm$  30% PSI  
37 window. All replicates of a given treatment were merged into a single file before MISO  
38 analysis of RNA-Seq data. The analysis was performed for all concentrations of 1C8,  
39 revealing a total of 86 unique events significantly affected (red dots indicating  $\Delta$ PSI  
40 larger than 30 percentage points and with Bayesian coefficient superior to 20 ; see  
41 Supplementary Table S2 for a list of significant events).

42

### 43 **Supplementary Figure S5. Validation of five cellular splicing events affected by** 44 **1C8.**

45 **A.** Graphic presentation of the splicing unit (bottom of the left panel) and the results of  
46 the RNA-Seq and MISO analysis for *ITGB3BP* unit from samples of HeLa-HIV cells  
47 treated with 1C8 (top of the left panel). The percent splicing index (PSI) of the *ITGB3BP*  
48 unit was determined by endpoint RT-PCR on samples of HeLa-HIV cells treated with the  
49 indicated concentrations of 1C8 and these values are shown in the histograms of the  
50 right panel. **B-E.** Similar descriptions for the alternative splicing units of *DOM3Z*, *ESYT2*,  
51 *RBM41* and *SPTAN1*, respectively.

52

53 **Supplementary Figure S6. Impact of siRNA-mediated knockdown of SRSF10 on**  
54 **five cellular splicing events affected by 1C8.**

55 **A.** Immunoblot showing the siRNA-mediated depletion of SRSF10 in 293 cells. **(B-F)**  
56 Histograms with percent splicing index (PSI) values for splicing units in *ITGB3BP*,  
57 *DOM3Z*, *ESYT2*, *RBM41* and *SPTAN1*.

58

59 **Supplementary Figure S7. MA plots depicting expression changes (log<sub>2</sub>FC) of**  
60 **human genes caused by different concentrations of 1C8 relative to their relative**  
61 **expression levels (logCPM) in untreated samples.**

62 The plots contain all expressed genes (15 867) based on a cpm cutoff of >1 in at least 4  
63 experimental samples. All the MA plots are on the same scale (fold change from +4 to -  
64 4). Genes whose expression increases and decreases by more than 2-fold are in red  
65 and blue, respectively.

66

67 **Supplementary Figure S8. Bar plots of expression hits at 1 μm of 1C8.**

68 The distribution of genes whose expression changes. Approximately 4000 expressed  
69 genes were binned in each category according to their global expression level in  
70 untreated samples (low, medium, high and super high). The number of genes whose  
71 expression was affected (increased in red and repressed in blue) at least two-fold is  
72 represented by bar graphs.

73

74 **Supplementary Table S1. Alternative splicing of cellular transcripts affected by**  
75 **1C8 as measured by endpoint RT-PCR.**

76 A set of 92 events was analyzed for alternative splicing using endpoint RT-PCR. Genes  
77 were selected for their ability to yield two amplicons of sizes that provide adequate  
78 resolution by microfluidic analysis using a RT-PCR screening platform (sequences of  
79 forward and reverse primers are indicated). HeLa-HIV cells were treated with 1C8 (1 and  
80 10  $\mu$ M) or DMSO as a control (in triplicates). Total RNA was extracted and RT-PCR  
81 analysis was carried out. For each sample, percent splicing index (PSI) values are given  
82 and changes relative to the control ( $\Delta$ PSI) were calculated. We used a statistical  
83 approach tailored to the analysis of genomic data based on the false discovery rate  
84 (FDR) expressed as a  $q$ -value. For example, a 5% FDR,  $q$  value  $\leq 0.05$  indicates that  
85 5% of the results judged to be significant could represent false positive signals. The  
86 section in green indicates  $q$  values that are smaller than 0.05, while only one value (in  
87 red) is inferior to 0.01.

88

89 **Supplementary Table S2. Cellular transcripts whose alternative splicing are**  
90 **affected by 1C8 as revealed by MISO analysis of RNA-Seq data.**

91

92 MISO analysis of RNA-Seq data revealed a set of 86 alternative splicing units affected  
93 by more than 30 percentage points in samples of HeLa-HIV cells treated with 1C8  
94 (Bayesian coefficient score greater than 20) in at least one level of drug treatment.  
95 Essentially, 106 significant shifting events were discovered respectively distributing as 9,  
96 16, 25 and 56 in the 1, 5, 10 and 20  $\mu\text{M}$  treatment with 1C8 (20 shifting events are  
97 occurring at more than one concentration). Event types are alternative 3' splice site  
98 (A3SS) alternative 5' splice site (A5SS) and skipped exon (SE), retained intron (RI) and  
99 mutually exclusive exon (MXE).

100

101 **Supplementary Table S3. Cellular transcripts with expression affected by 1  $\mu\text{M}$  of**  
102 **1C8 based on RNA-Seq data.**

103

104 List of transcripts whose expression was affected more than 2-fold ( $\log_2$  greater than 1  
105 or smaller than -1) with FDR values inferior to 0.05.

106

107 **Supplementary Table S4. Primers used in the study.**

108

| Gene           | q-values of $\Delta$ PSI |                       |
|----------------|--------------------------|-----------------------|
|                | CTRL – 1 $\mu$ M 1C8     | CTRL – 10 $\mu$ M 1C8 |
| <i>INF2</i>    | 6.470E-1                 | 4.171E-3              |
| <i>CLK1</i>    | 7.744E-1                 | 1.283E-2              |
| <i>AP2B1</i>   | 5.116E-1                 | 1.719E-2              |
| <i>ABI1</i>    | 5.116E-1                 | 3.226E-2              |
| <i>ADARB1</i>  | 6.102E-1                 | 3.226E-2              |
| <i>EPB41L1</i> | 8.901E-1                 | 3.228E-2              |
| <i>GRHL1</i>   | 6.470E-1                 | 3.228E-2              |
| <i>ADARB1</i>  | 6.102E-1                 | 3.298E-2              |
| <i>AMACR</i>   | 6.102E-1                 | 3.298E-2              |
| <i>ATG16L1</i> | 9.847E-1                 | 3.298E-2              |
| <i>C3orf17</i> | 9.847E-1                 | 3.298E-2              |
| <i>ECT2</i>    | 9.991E-1                 | 3.298E-2              |
| <i>KCNAB2</i>  | 8.901E-1                 | 3.298E-2              |
| <i>MAPKAP1</i> | 8.901E-1                 | 3.298E-2              |
| <i>SMN2</i>    | 6.102E-1                 | 3.298E-2              |
| <i>HNRNPAB</i> | 8.040E-1                 | 4.118E-2              |
| <i>ASB3</i>    | 5.116E-1                 | 4.425E-2              |
| <i>PALM</i>    | 7.711E-1                 | 4.425E-2              |
| <i>CASC4</i>   | 6.102E-1                 | 4.747E-2              |
| <i>ZMIZ2</i>   | 9.991E-1                 | 4.747E-2              |
| <i>APC</i>     | 9.991E-1                 | 4.763E-2              |
| <i>BRD8</i>    | 9.991E-1                 | 4.763E-2              |
| <i>DCUN1D4</i> | 8.040E-1                 | 4.763E-2              |
| <i>NKTR</i>    | 9.991E-1                 | 4.763E-2              |
| <i>BRD8</i>    | 9.314E-1                 | 4.980E-2              |
| <i>LRP8</i>    | 7.744E-1                 | 4.980E-2              |
| <i>PARL</i>    | 6.470E-1                 | 5.107E-2              |
| <i>LLGL2</i>   | 7.744E-1                 | 5.219E-2              |
| <i>LONRF3</i>  | 8.040E-1                 | 5.267E-2              |
| <i>TBC1D25</i> | 7.711E-1                 | 5.349E-2              |
| <i>PLOD2</i>   | 8.794E-1                 | 5.471E-2              |
| <i>GEMIN7</i>  | 9.847E-1                 | 5.650E-2              |
| <i>MKNK1</i>   | 9.847E-1                 | 6.202E-2              |
| <i>OSBPL3</i>  | 8.040E-1                 | 6.202E-2              |
| <i>NFAT5</i>   | 6.470E-1                 | 6.303E-2              |
| <i>PPIP5K1</i> | 7.744E-1                 | 6.951E-2              |
| <i>AGAP1</i>   | 9.991E-1                 | 7.385E-2              |
| <i>MTMR3</i>   | 8.040E-1                 | 7.385E-2              |
| <i>BOLA3</i>   | 6.040E-1                 | 7.435E-2              |
| <i>MBD1</i>    | 6.470E-1                 | 7.488E-2              |
| <i>CLCN6</i>   | 6.470E-1                 | 9.172E-2              |
| <i>FBF1</i>    | 8.794E-1                 | 9.466E-2              |
| <i>POLB</i>    | 9.702E-1                 | 9.466E-2              |
| <i>PML</i>     | 6.244E-1                 | 9.800E-2              |
| <i>CAMKK2</i>  | 7.744E-1                 | 9.829E-2              |
| <i>ODF2L</i>   | 9.991E-1                 | 9.829E-2              |

| Gene            | q-values of $\Delta$ PSI |                       |
|-----------------|--------------------------|-----------------------|
|                 | CTRL – 1 $\mu$ M 1C8     | CTRL – 10 $\mu$ M 1C8 |
| <i>ARFIP1</i>   | 7.076E-1                 | 1.028E-1              |
| <i>ERBB2IP</i>  | 9.991E-1                 | 1.028E-1              |
| <i>GTF2H2C</i>  | 8.794E-1                 | 1.028E-1              |
| <i>POGZ</i>     | 9.847E-1                 | 1.028E-1              |
| <i>ATG5</i>     | 5.116E-1                 | 1.046E-1              |
| <i>CDK5RAP2</i> | 6.102E-1                 | 1.072E-1              |
| <i>NDEL1</i>    | 7.744E-1                 | 1.072E-1              |
| <i>NFAT5</i>    | 5.116E-1                 | 1.072E-1              |
| <i>DPP8</i>     | 7.744E-1                 | 1.131E-1              |
| <i>GAB1</i>     | 9.314E-1                 | 1.201E-1              |
| <i>ARHGEF11</i> | 7.076E-1                 | 1.416E-1              |
| <i>FAM86A</i>   | 7.711E-1                 | 1.494E-1              |
| <i>AKIP1</i>    | 7.556E-1                 | 1.586E-1              |
| <i>GIT2</i>     | 9.991E-1                 | 1.586E-1              |
| <i>INSR</i>     | 6.102E-1                 | 1.586E-1              |
| <i>TMEM218</i>  | 9.991E-1                 | 1.586E-1              |
| <i>EIF6</i>     | 5.116E-1                 | 1.834E-1              |
| <i>PAOX</i>     |                          | 1.843E-1              |
| <i>MRPL33</i>   | 8.040E-1                 | 1.922E-1              |
| <i>PITPNC1</i>  | 5.116E-1                 | 1.922E-1              |
| <i>ATP2A1</i>   | 7.744E-1                 | 1.993E-1              |
| <i>GTF2I</i>    | 9.012E-1                 | 2.018E-1              |
| <i>SYNE2</i>    | 6.040E-1                 | 2.018E-1              |
| <i>AP3M1</i>    | 7.711E-1                 | 2.226E-1              |
| <i>N6AMT1</i>   | 9.991E-1                 | 2.226E-1              |
| <i>BTRC</i>     | 8.673E-1                 | 2.231E-1              |
| <i>ATP5S</i>    | 7.744E-1                 | 2.334E-1              |
| <i>ADNP</i>     | 9.991E-1                 | 2.361E-1              |
| <i>CD151</i>    | 5.116E-1                 | 2.467E-1              |
| <i>CTBP1</i>    | 8.927E-1                 | 2.467E-1              |
| <i>LRRC23</i>   | 8.040E-1                 | 2.467E-1              |
| <i>ABCD4</i>    | 7.711E-1                 | 2.617E-1              |
| <i>MEIS2</i>    | 5.116E-1                 | 2.668E-1              |
| <i>LHX6</i>     | 6.470E-1                 | 2.874E-1              |
| <i>HPS1</i>     | 9.770E-1                 | 3.180E-1              |
| <i>OSBPL9</i>   | 7.744E-1                 | 3.312E-1              |
| <i>MCAT</i>     | 9.277E-1                 | 3.323E-1              |
| <i>DTNB</i>     | 9.991E-1                 | 3.662E-1              |
| <i>MTMR2</i>    | 9.314E-1                 | 3.662E-1              |
| <i>NFATC2</i>   |                          | 3.710E-1              |
| <i>ANAPC11</i>  | 5.116E-1                 | 4.092E-1              |
| <i>MARK2</i>    | 9.036E-1                 | 4.101E-1              |
| <i>ARHGAP17</i> | 8.040E-1                 | 4.104E-1              |
| <i>MAPKAP1</i>  | 9.991E-1                 | 4.104E-1              |
| <i>PDE9A</i>    | 8.040E-1                 | 4.145E-1              |
| <i>BTC</i>      | 5.116E-1                 | 4.310E-1              |

| Gene Symbol | Event type | Treatment | Psi. Diff.Score | Bayes Factor | Event name                                                                                                  |
|-------------|------------|-----------|-----------------|--------------|-------------------------------------------------------------------------------------------------------------|
| AC005077.12 | A3SS       | 10uM      | 0.40            | 660327.00    | chr7:76090972:76091153:+@chr7:76092862:76093026:+@chr7:76109738:76110094:+@chr7:76111825:76112464:+         |
| AC068533.7  | A5SS       | 5uM       | 0.30            | 638.00       | chr7:65592691:65592727:+@chr7:65595114:65595235:+@chr7:65595731:65595829:+                                  |
| ALG13       | A5SS       | 1uM       | 0.34            | 67080.00     | chrX:110928193:110928331:+@chrX:110932315:110932425:+@chrX:110951255:110951621:+@chrX:110952193:110952276:- |
| ARFGAP2     | MXE        | 10uM      | -0.31           | 21.00        | chr11:47198067:47198185:-@chr11:47197402:47197474:+@chr11:47196733:47196864:-@chr11:47193832:47193884:-     |
| ARFGAP2     | MXE        | 20uM      | -0.30           | 425.00       | chr11:47198067:47198185:-@chr11:47197402:47197474:+@chr11:47196733:47196864:-@chr11:47193832:47193884:-     |
| ARL13B      | A3SS       | 10uM      | 0.36            | 20.00        | chr3:93698983:93699326:+@chr3:93714722:93714788:+@chr3:93754175:93754285:+@chr3:93755396:93755598:+         |
| ASAH2B      | A3SS       | 5uM       | -0.32           | 29.00        | chr10:52502675:52502770:+@chr10:52504962:52505034:+@chr10:52509103:52509162:+                               |
| ATP5G2      | SE         | 20uM      | -0.35           | 54.00        | chr12:54069960:54070512:-@chr12:54067480:54067596:-@chr12:54066360:54066429:-                               |
| ATPAF1      | A5SS       | 1uM       | 0.36            | 158.00       | chr1:46655029:46654852 46654914:-@chr1:46654353:46654652:-                                                  |
| ATPAF1      | A5SS       | 20uM      | 0.30            | 29.00        | chr1:46655029:46654852 46654914:-@chr1:46654353:46654652:-                                                  |
| BTD         | MXE        | 5uM       | -0.39           | 39.00        | chr3:15643255:15643401:+@chr3:15643644:15643817:+@chr3:15676931:15677195:+                                  |
| C19orf47    | SE         | 20uM      | 0.41            | 248.00       | chr19:40839758:40839836:-@chr19:40838429:40838550:-@chr19:40834320:40834457:-                               |
| C19orf47    | SE         | 5uM       | 0.42            | 299.00       | chr19:40839758:40839836:-@chr19:40838429:40838550:-@chr19:40834320:40834457:-                               |
| CAMK2D      | A5SS       | 10uM      | -0.51           | 1.00E+12     | chr4:114378719:114378447 114378491:-@chr4:114372188:114375671:-                                             |
| CAMK2D      | A5SS       | 20uM      | -0.43           | 8.75E+06     | chr4:114378719:114378447 114378491:-@chr4:114372188:114375671:-                                             |
| CAMK2D      | A5SS       | 5uM       | -0.44           | 406.00       | chr4:114378719:114378447 114378491:-@chr4:114372188:114375671:-                                             |
| CC2D1B      | RI         | 1uM       | -0.31           | 12805.00     | chr1:52824133:52824003:-@chr1:52823570:52823453:-                                                           |
| CNOT1       | MXE        | 20uM      | 0.31            | 49.00        | chr16:58663632:58663790:-@chr16:58658577:58658698:-@chr16:58657186:58657313:-@chr16:58633140:58633415:-     |
| DCHS1       | A3SS       | 20uM      | 0.32            | 31.00        | chr11:6624634:6624880:-@chr11:6623445 6623494:6623082:-                                                     |
| DDX41       | RI         | 20uM      | 0.33            | 1.00E+12     | chr5:176942822:176942686:-@chr5:176942340:176942187:-                                                       |
| DHX34       | SE         | 1uM       | 0.39            | 81.00        | chr19:47879700:47879817:+@chr19:47880172:47880246:+@chr19:47880357:47880463:+                               |
| DOM3Z       | A3SS       | 20uM      | 0.40            | 76764.00     | chr6:31938689:31938924:-@chr6:31938529 31938602:31938383:-                                                  |
| EDC3        | SE         | 20uM      | 0.34            | 530.00       | chr15:74988221:74988386:-@chr15:74979432:74979520:-@chr15:74967302:74967483:-                               |
| ELP5        | SE         | 10uM      | -0.35           | 1.00E+12     | chr17:7157902:7158122:+@chr17:7160176:7160357:+@chr17:7161907:7162002:+                                     |
| ENGASE4     | A5SS       | 20uM      | -0.31           | 1.00E+12     | chr17:77077980:77078145 77078959:+@chr17:77079102:77079205:+                                                |
| ERBB2       | SE         | 10uM      | 0.33            | 32.00        | chr17:37868575:37868701:+@chr17:37869406:37869522:+@chr17:37871539:37871612:+                               |
| ESYT2       | SE         | 10uM      | -0.31           | 1.00E+12     | chr7:158552177:158552272:-@chr7:158545472:158545534:-@chr7:158542340:158542414:-                            |
| ESYT2       | SE         | 20uM      | -0.31           | 1.00E+12     | chr7:158552177:158552272:-@chr7:158545472:158545534:-@chr7:158542340:158542414:-                            |
| FGFR1       | SE         | 20uM      | 0.38            | 91.00        | chr8:38314874:38315052:-@chr8:38287200:38287466:-@chr8:38285864:38285953:-                                  |
| FN1         | SE         | 20uM      | 0.36            | 1.00E+12     | chr2:216259251:216259442:-@chr2:216257654:216257926:-@chr2:216256355:216256537:-                            |
| GALT        | A5SS       | 10uM      | 0.41            | 1.00E+12     | chr9:34646674:34646783:+@chr9:34647086:34647255:+                                                           |
| GALT        | A5SS       | 20uM      | 0.33            | 2003.00      | chr9:34646642:34646783 34646916:+@chr9:34647086:34647255:+                                                  |
| GALT        | A5SS       | 20uM      | 0.35            | 2.28E+06     | chr9:34646674:34646783:+@chr9:34647086:34647255:+                                                           |
| GALT        | A5SS       | 5uM       | 0.36            | 2.32E+07     | chr9:34646642:34646783 34646916:+@chr9:34647086:34647255:+                                                  |
| GALT        | A5SS       | 5uM       | 0.31            | 2216.00      | chr9:34646674:34646783:+@chr9:34647086:34647255:+                                                           |
| GUSB        | SE         | 5uM       | 0.34            | 41.00        | chr7:65445211:65445396:-@chr7:65444821:65444898:-@chr7:65444386:65444528:-                                  |
| HDAC6       | RI         | 10uM      | 0.31            | 778342.00    | chrX:48664038:48664078:+@chrX:48664775:48664871:+                                                           |
| HDLBP       | SE         | 20uM      | -0.31           | 76.00        | chr2:242254985:242255117:-@chr2:242208244:242208710:-@chr2:242207892:242207956:-                            |
| IL17RC      | RI         | 20uM      | 0.45            | 340.00       | chr3:9965565:9965704:+@chr3:9965916:9965975:+                                                               |
| IRF9,RNF31  | SE         | 10uM      | 0.35            | 24.00        | chr14:24633823:24634164:+@chr14:24634266:24634392:+@chr14:24635056:24635171:+                               |
| IRF9,RNF31  | SE         | 20uM      | 0.31            | 20.00        | chr14:24633823:24634164:+@chr14:24634266:24634392:+@chr14:24635056:24635171:+                               |
| ITGB3BP     | SE         | 10uM      | -0.34           | 1.00E+12     | chr1:63919589:63919645:-@chr1:63913236:63913285:-@chr1:63912477:63912527:-                                  |
| ITGB3BP     | SE         | 20uM      | -0.42           | 1.00E+12     | chr1:63919589:63919645:-@chr1:63913236:63913285:-@chr1:63912477:63912527:-                                  |
| KIAA0528    | SE         | 20uM      | 0.32            | 52.00        | chr12:22612426:22612476:-@chr12:22611418:22611519:-@chr12:22609905:22610095:-                               |
| KIF21A      | SE         | 20uM      | -0.31           | 101.00       | chr12:39713708:39713815:-@chr12:39711875:39712003:-@chr12:39705219:39705355:-                               |
| LAS1L       | SE         | 10uM      | 0.35            | 1.00E+12     | chrX:64744845:64744930:-@chrX:64744444:64744494:-@chrX:64743936:64744142:-                                  |
| LAS1L       | SE         | 20uM      | 0.35            | 1.00E+12     | chrX:64744845:64744930:-@chrX:64744444:64744494:-@chrX:64743936:64744142:-                                  |
| LINC00665   | MXE        | 20uM      | 0.31            | 68.00        | chr19:36822349:36822620:-@chr19:36821155:36821394:-@chr19:36813032:36813286:-@chr19:36812895:36812932:-     |
| LMBR1L      | MXE        | 1uM       | 0.44            | 93973.00     | chr12:49500744:49500828:-@chr12:49499707:49499740:-@chr12:49498529:49498668:-@chr12:49497470:49497596:-     |
| LTBP1       | SE         | 20uM      | 0.31            | 72.00        | chr2:33540211:33540336:+@chr2:33567905:33568030:+@chr2:33572434:33572577:+                                  |
| MEGF6       | SE         | 5uM       | 0.40            | 3020.00      | chr1:3413797:3413925:-@chr1:3413552:3413683:-@chr1:3413219:3413347:-                                        |
| MLL3        | A5SS       | 1uM       | -0.36           | 30.00        | chr7:151842380:151842238 151842250:-@chr7:151841798:151841966:-                                             |
| MTMR14      | SE         | 1uM       | -0.32           | 84.00        | chr3:9730628:9730766:+@chr3:9739395:9739550:+@chr3:9743474:9744078:+                                        |
| MTMR2       | SE         | 10uM      | 0.41            | 142.00       | chr11:95657039:95657371:-@chr11:95647406:95647476:-@chr11:95621320:95621425:-                               |
| MTMR2       | SE         | 20uM      | 0.33            | 36.00        | chr11:95657039:95657371:-@chr11:95647406:95647476:-@chr11:95621320:95621425:-                               |
| MTMR2       | SE         | 20uM      | 0.31            | 131.00       | chr11:95621320:95621425:-@chr11:95620776:95620848:-@chr11:95598765:95598840:-                               |
| MUC1        | MXE        | 5uM       | -0.32           | 50.00        | chr1:155160484:155160539:-@chr1:155160198:155160329:-@chr1:155159931:155160052:-@chr1:155159701:155159850:- |
| NAA60       | MXE        | 10uM      | -0.37           | 138.00       | chr16:34993668:34993837:+@chr16:3497482:3497620:+@chr16:3498471:3498540:+                                   |
| NAA60       | MXE        | 10uM      | -0.36           | 1.09E+10     | chr16:34993649:34993827:+@chr16:3497482:3497620:+@chr16:3498471:3498540:+                                   |
| NAA60       | MXE        | 20uM      | -0.34           | 16042.00     | chr16:34993668:34993837:+@chr16:3497482:3497620:+@chr16:3498471:3498540:+                                   |
| NAA60       | MXE        | 5uM       | -0.37           | 1205.00      | chr16:34993668:34993837:+@chr16:3497482:3497620:+@chr16:3498471:3498540:+                                   |
| NAA60       | MXE        | 5uM       | -0.37           | 1.00E+12     | chr16:34993649:34993827:+@chr16:3497482:3497620:+@chr16:3498471:3498540:+                                   |
| NAP1L4      | SE         | 20uM      | -0.35           | 1.00E+12     | chr11:2972489:2972545:-@chr11:2970457:2970494:-@chr11:2965660:2966876:-                                     |
| NDUFV3      | MXE        | 10uM      | -0.30           | 1.00E+12     | chr21:44317037:44317157:+@chr21:44323292:44324386:+@chr21:44328974:44329773:+                               |
| NIP2A       | MXE        | 20uM      | 0.36            | 992.00       | chr15:23034147:23034427:-@chr15:23033894:23034006:-@chr15:23027801:23027922:-@chr15:23021198:23021429:-     |
| NIP2A       | MXE        | 20uM      | 0.37            | 2.20E+08     | chr15:23034147:23034427:-@chr15:23033894:23034006:-@chr15:23033278:23033413:-@chr15:23021198:23021429:-     |
| NIP2A       | MXE        | 20uM      | -0.41           | 27.00        | chr15:23034147:23034427:-@chr15:23033894:23034006:-@chr15:23033278:23033413:-                               |

| Gene Symbol  | Event type | Treatment | Psi. Diff. Score | Bayes Factor | Event name                                                                                                  |
|--------------|------------|-----------|------------------|--------------|-------------------------------------------------------------------------------------------------------------|
| PCMC1        | SE         | 10uM      | 0.36             | 172.00       | chr8:17797200:17797370:+@chr8:17797551:17797667:+@chr8:17804695:17804872:+                                  |
| PDCD10       | MXE        | 10uM      | -0.41            | 6.81E+06     | chr3:167452594:167452651:-@chr3:167452002:167452034:-@chr3:167443189:167443261:-@chr3:167437850:167438061:- |
| PDCD10       | MXE        | 10uM      | -0.36            | 41052.00     | chr3:167452002:167452138:-@chr3:167443189:167443261:-@chr3:167437850:167438061:-                            |
| PDCD10       | MXE        | 20uM      | -0.36            | 243.00       | chr3:167452594:167452651:-@chr3:167452002:167452034:-@chr3:167443189:167443261:-@chr3:167437850:167438061:- |
| PLSCR3       | SE         | 20uM      | 0.35             | 249.00       | chr17:7296786:7296828:-@chr17:7296463:7296683:-@chr17:7296110:7296271:-                                     |
| PIIP5K2      | SE         | 20uM      | -0.30            | 13821.00     | chr5:102515722:102515889:+@chr5:102518935:102519108:+@chr5:102520373:102520445:+                            |
| PREPL        | SE         | 20uM      | 0.36             | 1372.00      | chr2:44588663:44589001:-@chr2:44586636:44586889:-@chr2:44573407:44573529:-                                  |
| RBM23        | SE         | 10uM      | 0.34             | 19811.00     | chr14:23388208:23388358:-@chr14:23380995:23381112:-@chr14:23380537:23380612:-                               |
| RBM41        | MXE        | 20uM      | 0.31             | 1.00E+12     | chrX:106358582:106358786:-@chrX:106356627:106356698:-@chrX:106331666:106332069:-                            |
| RCOR3        | SE         | 20uM      | 0.32             | 249.00       | chr1:211477425:211477482:+@chr1:211486062:211486177:+@chr1:211486766:211489725:+                            |
| RHBD2        | SE         | 1uM       | -0.35            | 37.00        | chr7:75508317:75508578:+@chr7:75510683:75510804:+@chr7:75511147:75511554:+                                  |
| RHBD2        | SE         | 20uM      | -0.30            | 64.00        | chr7:75508317:75508578:+@chr7:75510683:75510804:+@chr7:75511147:75511554:+                                  |
| RP4-564F22.2 | A5SS       | 20uM      | 0.32             | 1.00E+12     | chr20:37063976:37063670 37063840:-@chr20:37063147:37063269:-                                                |
| SCNN1D       | SE         | 20uM      | -0.51            | 35428.00     | chr1:1219358:1219470:+@chr1:1220951:1221044:+@chr1:1221306:1221658:+                                        |
| SCNN1D       | SE         | 5uM       | -0.38            | 40.00        | chr1:1219358:1219470:+@chr1:1220951:1221044:+@chr1:1221306:1221658:+                                        |
| SDR39U1      | A5SS       | 20uM      | -0.30            | 76.00        | chr14:24911466:24911304 24911384:-@chr14:24910880:24911001:-                                                |
| SDR39U1      | A5SS       | 20uM      | -0.30            | 115.00       | chr14:24911466:24911315 24911384:-@chr14:24910880:24911001:-                                                |
| SDR39U1      | A5SS       | 20uM      | -0.40            | 4.54E+09     | chr14:24911466:24911315 24911384:-@chr14:24909989:24910132:-                                                |
| SDR39U1      | A5SS       | 20uM      | -0.36            | 1.50E+10     | chr14:24911466:24911304 24911384:-@chr14:24909989:24910132:-                                                |
| SEC22C       | MXE        | 10uM      | 0.37             | 27.00        | chr3:42610357:42610565:-@chr3:42608236:42608328:-@chr3:42605257:42605472:-@chr3:42605015:42605178:-         |
| SEPT7P2      | SE         | 5uM       | 0.31             | 27.00        | chr7:45786814:45786910:-@chr7:45786426:45786547:-@chr7:45784596:45784647:-                                  |
| SGSH         | MXE        | 1uM       | -0.33            | 22.00        | chr17:78190831:78190991:-@chr17:78188832:78188937:-@chr17:78188414:78188564:-@chr17:78187971:78188127:-     |
| SGSM2        | SE         | 10uM      | -0.38            | 1440.00      | chr17:2268509:2268635:+@chr17:2270565:2270699:+@chr17:2274556:2274709:+                                     |
| SPTAN1       | SE         | 10uM      | -0.40            | 6076.00      | chr9:131353756:131353904:+@chr9:131355262:131355321:+@chr9:131356454:131356652:+                            |
| ST3GAL6      | MXE        | 5uM       | -0.30            | 28.00        | chr3:98491657:98491760:+@chr3:98492764:98492827:+@chr3:98503789:98503884:+@chr3:98506880:98507066:+         |
| TAPBP        | MXE        | 20uM      | -0.31            | 3.73E+10     | chr6:33281782:33282164:-@chr6:33281471:33281641:-@chr6:33280994:33281254:-@chr6:33272766:33273164:-         |
| TOR1AIIP1    | A3SS       | 20uM      | 0.34             | 87.00        | chr1:179853827:179853904:+@chr1:179858445 179858448:179858504:+                                             |
| TPM1         | A3SS       | 10uM      | 0.31             | 1444.00      | chr15:63334838:63335142:+@chr15:63335668 63335905:63336030:+                                                |
| TPM1         | A3SS       | 20uM      | 0.43             | 1.00E+12     | chr15:63334838:63335142:+@chr15:63335668 63335905:63336030:+                                                |
| TPM1         | A3SS       | 5uM       | 0.34             | 269.00       | chr15:63334838:63335142:+@chr15:63335668 63335905:63336030:+                                                |
| TRIM5        | SE         | 20uM      | 0.34             | 115.00       | chr11:5706098:5706339:-@chr11:5705216:5705369:-@chr11:5700991:5701468:-                                     |
| UEVLD        | MXE        | 10uM      | 0.36             | 27.00        | chr11:18610160:18610293:-@chr11:18600271:18600355:-@chr11:18596894:18596959:-@chr11:18591761:18591924:-     |
| WASF2        | SE         | 20uM      | -0.49            | 1.00E+12     | chr1:27739066:27739221:-@chr1:27736186:27736700:-@chr1:27730734:27734840:-                                  |
| WDR45        | A3SS       | 20uM      | -0.33            | 125.00       | chrX:48935302:48935406:-@chrX:48934409 48934484:48934304:-                                                  |
| ZFYVE26      | RI         | 20uM      | 0.35             | 1.17E+09     | chr14:68229129:68228920:-@chr14:68228301:68228083:-                                                         |
| ZNF195       | MXE        | 20uM      | 0.33             | 375.00       | chr11:3392205:3392300:-@chr11:3383027:3383119:-@chr11:3381950:3382018:-@chr11:3379157:3381795:-             |
| ZNF266       | SE         | 20uM      | 0.37             | 28.00        | chr19:9545784:9545869:-@chr19:9545474:9545535:-@chr19:9530741:9530894:-                                     |
| ZNF330       | A5SS       | 20uM      | 0.31             | 55.00        | chr4:142143520:142143631 142143645:+@chr4:142145641:142145660:+                                             |
| ZNF562       | MXE        | 20uM      | 0.36             | 46.00        | chr19:9771396:9771550:-@chr19:9770055:9770143:-@chr19:9768685:9768811:-@chr19:9767223:9767329:-             |



| Gene                 | 1 $\mu$ M 1C8                   |           |
|----------------------|---------------------------------|-----------|
|                      | Fold change (Log <sub>2</sub> ) | FDR value |
| <i>GPR183</i>        | 2.650443                        | 2.48E-08  |
| <i>SPINK1</i>        | 2.574378                        | 7.71E-14  |
| <i>AC068057.1</i>    | 2.149233                        | 0.001587  |
| <i>INPP5D</i>        | 2.075333                        | 8.42E-09  |
| <i>KLHDC1</i>        | 1.983792                        | 0.003443  |
| <i>LPL</i>           | 1.969363                        | 4.94E-60  |
| <i>APOBEC3H</i>      | 1.905028                        | 1.13E-05  |
| <i>RP11-611O2.5</i>  | 1.891939                        | 0.000476  |
| <i>CHL1</i>          | 1.840547                        | 0.000369  |
| <i>EDN1</i>          | 1.808004                        | 5.82E-22  |
| <i>KCNN2</i>         | 1.764675                        | 2.13E-08  |
| <i>HSF2BP</i>        | 1.724695                        | 1.50E-47  |
| <i>FGF</i>           | 1.674479                        | 3.50E-06  |
| <i>RP11-809N8.5</i>  | 1.658597                        | 0.016428  |
| <i>TM4SF1</i>        | 1.627575                        | 2.11E-49  |
| <i>LIX1</i>          | 1.626405                        | 0.003474  |
| <i>HSPA9P1</i>       | 1.603818                        | 0.032998  |
| <i>RP5-1198O20.4</i> | 1.591723                        | 2.08E-05  |
| <i>PDE2A</i>         | 1.586868                        | 4.06E-56  |
| <i>INSL4</i>         | 1.579286                        | 1.25E-21  |
| <i>ANO2</i>          | 1.573054                        | 1.57E-20  |
| <i>SCG2</i>          | 1.557212                        | 1.53E-06  |
| <i>PTGER3</i>        | 1.527466                        | 8.70E-08  |
| <i>RP11-807H7.2</i>  | 1.483031                        | 0.03631   |
| <i>CUL4A</i>         | 1.468718                        | 1.01E-43  |
| <i>C5orf46</i>       | 1.415557                        | 6.41E-09  |
| <i>CRISPLD2</i>      | 1.406103                        | 2.21E-11  |
| <i>RP11-115D19.1</i> | 1.403545                        | 0.034854  |
| <i>GRHL3</i>         | 1.400786                        | 0.018813  |
| <i>TNFAIP3</i>       | 1.398859                        | 2.60E-39  |
| <i>RP11-78A19.4</i>  | 1.394101                        | 1.87E-05  |
| <i>ITGA11</i>        | 1.377958                        | 0.004201  |
| <i>FGG</i>           | 1.37735                         | 3.92E-09  |
| <i>FGFBP1</i>        | 1.377072                        | 0.00014   |
| <i>PSG5</i>          | 1.342883                        | 3.54E-05  |
| <i>HRCT1</i>         | 1.341015                        | 3.32E-11  |
| <i>CCDC68</i>        | 1.303014                        | 6.09E-20  |
| <i>SCG5</i>          | 1.294259                        | 5.36E-05  |
| <i>FTH1P11</i>       | 1.292303                        | 0.010688  |
| <i>MYT1L</i>         | 1.290632                        | 2.88E-11  |
| <i>AC023137.2</i>    | 1.282045                        | 0.001057  |
| <i>SPINK6</i>        | 1.262633                        | 0.0005    |
| <i>DNMT3L</i>        | 1.247603                        | 2.46E-08  |
| <i>PLEKHG4B</i>      | 1.246211                        | 0.018468  |
| <i>ALPK2</i>         | 1.238146                        | 2.20E-05  |
| <i>RGS2</i>          | 1.231964                        | 1.03E-23  |
| <i>SLC16A6</i>       | 1.231223                        | 1.23E-29  |
| <i>RP11-421L10.1</i> | 1.226661                        | 0.008277  |
| <i>GLIPR1L2</i>      | 1.218035                        | 0.024921  |
| <i>RP11-144N1.1</i>  | 1.21039                         | 0.005083  |
| <i>RXFP1</i>         | 1.208839                        | 2.40E-05  |
| <i>VWA5A</i>         | 1.207525                        | 4.28E-33  |
| <i>ACTA2</i>         | 1.202727                        | 1.24E-05  |
| <i>RP1-140K8.5</i>   | 1.188101                        | 7.77E-09  |
| <i>RP11-399H11.2</i> | 1.185094                        | 0.00139   |
| <i>PSG9</i>          | 1.174724                        | 0.009592  |
| <i>RP11-347C18.3</i> | 1.171276                        | 0.040768  |
| <i>OLFM1</i>         | 1.154358                        | 3.80E-19  |
| <i>PSG1</i>          | 1.151686                        | 0.009213  |
| <i>CTC-295J13.3</i>  | 1.150792                        | 0.005046  |
| <i>CRB1</i>          | 1.14419                         | 1.19E-13  |
| <i>GAGE2A</i>        | 1.142999                        | 0.043287  |
| <i>FOXQ1</i>         | 1.135102                        | 1.02E-18  |
| <i>CYR61</i>         | 1.12529                         | 3.35E-24  |
| <i>EID3</i>          | 1.124967                        | 0.010763  |

| Gene                 | 1 $\mu$ M 1C8                   |           |
|----------------------|---------------------------------|-----------|
|                      | Fold change (Log <sub>2</sub> ) | FDR value |
| <i>RP11-64D22.2</i>  | 1.115672                        | 5.69E-06  |
| <i>KB-1991G8.1</i>   | 1.11473                         | 0.001487  |
| <i>RP11-154J22.1</i> | 1.110004                        | 0.00724   |
| <i>CD83</i>          | 1.101461                        | 2.12E-32  |
| <i>FMO5</i>          | 1.100955                        | 0.032603  |
| <i>SGK1</i>          | 1.09107                         | 4.27E-37  |
| <i>SPATA18</i>       | 1.089338                        | 1.11E-07  |
| <i>TM4SF1-AS1</i>    | 1.086954                        | 3.94E-06  |
| <i>CHKB-AS1</i>      | 1.083088                        | 0.019742  |
| <i>RP11-134G8.8</i>  | 1.06926                         | 0.040298  |
| <i>GRAMD3</i>        | 1.068721                        | 8.32E-11  |
| <i>MYPN</i>          | 1.067613                        | 3.75E-19  |
| <i>PCID2</i>         | 1.062882                        | 3.26E-32  |
| <i>CTD-2139B15.5</i> | 1.062001                        | 3.21E-05  |
| <i>NUPR1</i>         | 1.061691                        | 5.55E-15  |
| <i>RP5-1028K7.2</i>  | 1.060282                        | 0.019401  |
| <i>FAM43A</i>        | 1.059855                        | 8.74E-15  |
| <i>CPM</i>           | 1.05938                         | 9.93E-22  |
| <i>CHMP1B</i>        | 1.050854                        | 5.77E-18  |
| <i>ARL4A</i>         | 1.047929                        | 2.43E-18  |
| <i>RP11-467D6.1</i>  | 1.035512                        | 0.000982  |
| <i>MFF</i>           | 1.034311                        | 1.47E-29  |
| <i>AC003104.1</i>    | 1.030898                        | 4.19E-06  |
| <i>SPINK13</i>       | 1.028151                        | 1.55E-07  |
| <i>ITPR1</i>         | 1.025354                        | 1.04E-17  |
| <i>RP11-356I2.4</i>  | 1.015603                        | 1.19E-08  |
| <i>LINC00471</i>     | 1.008444                        | 0.012322  |
| <i>SMC1B</i>         | 1.003701                        | 0.034351  |
| <i>FTH1P20</i>       | 1.003479                        | 0.026094  |
| <i>RP11-383H13.1</i> | 1.002233                        | 0.040768  |
| <i>CFH</i>           | -1.00233                        | 1.09E-05  |
| <i>RN7SK</i>         | -1.0043                         | 0.040578  |
| <i>GPR50</i>         | -1.02022                        | 2.83E-09  |
| <i>RP11-95O2.5</i>   | -1.02056                        | 0.03365   |
| <i>EPGN</i>          | -1.02859                        | 0.022321  |
| <i>AF003625.3</i>    | -1.03325                        | 1.92E-05  |
| <i>KLRC2</i>         | -1.04006                        | 4.89E-05  |
| <i>RP3-395M20.12</i> | -1.04413                        | 3.59E-05  |
| <i>HOXA-AS2</i>      | -1.05449                        | 2.55E-15  |
| <i>RP11-715J22.2</i> | -1.07652                        | 0.025005  |
| <i>ITGB4</i>         | -1.09704                        | 0.048179  |
| <i>PPL</i>           | -1.10616                        | 2.23E-05  |
| <i>RP13-238F13.5</i> | -1.12623                        | 0.000755  |
| <i>ARC</i>           | -1.13624                        | 0.003111  |
| <i>RAB6C-AS1</i>     | -1.14205                        | 0.02      |
| <i>C20orf166-AS1</i> | -1.14246                        | 0.006623  |
| <i>LIPH</i>          | -1.15069                        | 0.016412  |
| <i>RAPGEF3</i>       | -1.15633                        | 6.11E-06  |
| <i>G0S2</i>          | -1.16014                        | 0.003552  |
| <i>FAP</i>           | -1.17566                        | 1.26E-15  |
| <i>GAS6-AS1</i>      | -1.18169                        | 0.018203  |
| <i>ZCCHC12</i>       | -1.18399                        | 2.50E-16  |
| <i>GRB7</i>          | -1.241                          | 0.013022  |
| <i>ELF3</i>          | -1.25264                        | 4.71E-10  |
| <i>RP11-284F21.9</i> | -1.26778                        | 6.16E-05  |
| <i>FOSB</i>          | -1.27149                        | 7.83E-06  |
| <i>FAM231D</i>       | -1.27846                        | 0.009667  |
| <i>H19</i>           | -1.28402                        | 1.98E-05  |
| <i>CXCL3</i>         | -1.29749                        | 0.001547  |
| <i>NMUR1</i>         | -1.38076                        | 0.024921  |
| <i>SSC5D</i>         | -1.47675                        | 1.95E-07  |
| <i>ANGPTL4</i>       | -1.62486                        | 0.000903  |
| <i>RP11-474O21.5</i> | -1.64184                        | 0.000216  |
| <i>AL161626.1</i>    | -1.64267                        | 0.034338  |
| <i>MIR663A</i>       | -1.72027                        | 0.007235  |
| <i>LINC00319</i>     | -2.71392                        | 2.49E-71  |

## 1. Primers for HIV-1

For analysis of HIV-1 transcripts, primers were designed based on Human immunodeficiency virus 1, complete genome sequence: NCBI Reference Sequence: NC\_001802.1

### 1.1. Primers for quantitative real-time PCR

|                |                                          |
|----------------|------------------------------------------|
| HIV-US.1.FWD   | 5'- CTG AAG CGC GCA CGG CAA -3'          |
| HIV-US.1.REV   | 5'- GAC GCT CTC GCA CCC ATC TC -3'       |
| HIV-US.2.FWD   | 5'- GGA CAG CTA CAA CCA TCC CT -3'       |
| HIV-US.2.REV   | 5'- TGA CCT GAT TGC TGT GTC CT -3'       |
| HIV-US.4.FWD   | 5'- GGG AAA GCT AGG GGA TGG TT -3'       |
| HIV-US.4.REV   | 5'- TGA CCC AAA TGC CAG TCT CT -3'       |
| HIV-SS.1.FWD   | 5'- GGC GGC GAC TGG AAG AAG C -3'        |
| HIV-SS.1.REV   | 5'- CTA TGA TTA CTA TGG ACC ACA C -3'    |
| HIV-SS.1.2.FWD | 5'- GGC GGC GAC TGG AAG AAG C -3'        |
| HIV-SS.1.2.REV | 5'- CCC CCA TCT CCA CAA GTG CTG A -3'    |
| HIV-SS.2.FWD   | 5'- GGC GGC GAC TGA CTC TGC TAT AAG -3'  |
| HIV-SS.2.REV   | 5'- TTG GTC TTC TGG GGC TTG TT -3'       |
| HIV-SS.3.FWD   | 5'- GGC GGC GAC TG T TTG TTT CAT AAC -3' |
| HIV-SS.3.REV   | 5'- AGA GAA GCT TGA TGA GTC TGA CTG -3'  |
| HIV-SS.4.FWD   | 5'- GCG GCG ACT G AA TTG GGT GTC -3'     |
| HIV-SS.4.REV   | 5'- GGC TGA CTT CCT GGA TGC TTC C -3'    |

### 1.2. Primers for HIV-1 endpoint PCR

|              |                                         |
|--------------|-----------------------------------------|
| HIV-AS-2.FWD | 5'- TCT CTC GAC GCA GGA CTC G -3'       |
| HIV-AS-2.REV | 5'- TTG GGA GGT GGG TTG CTT TGA TAG -3' |

## 2. Primers for *SRSF10* quantitative RT-PCR

|             |                              |
|-------------|------------------------------|
| FUSP1_G_1_F | 5' AGAAAGTGGATTTGTGGACGGC 3' |
| FUSP1_G_1_R | 5'-ACATTCCTCCCTTCCTTGCTT-3'  |

## 3. Primers for quantitative RT-PCR of HIV fragments antibodies following RNA immunoprecipitation with anti-Flag

|           |                                  |
|-----------|----------------------------------|
| HIV_1-FWD | 5'- GTGCAGAACATCCAGGGGCAAA-3'    |
| HIV_1-REV | 5'- TCTTGTGGGGTGGCTCCTTCT-3'     |
| HIV_3-FWD | 5'- TGTGAAAGGAAGGACACCAAATGA-3'  |
| HIV_3-REV | 5'- TCCTTGTCTATCGGCTCCTGCT -3'   |
| HIV_5-FWD | 5'- CCCC GGCTGGTTTTGCGATT-3'     |
| HIV_5-REV | 5'- ACCTCTTCTTCTGCTAGACTGCCAT-3' |
| HIV_8-FWD | 5'- CCCGACAGGCCCGAAGGAATA-3'     |
| HIV_8-REV | 5'- CCCCTGCGTCCCAGAAGTT-3'       |

4. Primers for endpoint PCR of transcripts from *Bcl-x* minigenes

X34                    5'-AGGGAGGCAGGCGACGGCGACGAGTTT-3'  
X-Age-Rev            5'-CCGGTGGATCCCCCGGGCTGCAGGAATTCGAT-3'

5. Primers for endpoint PCR of various splicing units

BCLAF1-FWD        5'-GTCTGGTTCTGTTGGAAATA-3'  
BCLAF1-REV        5'-AGCAAGCAGCCTGTCTTTAGTC-3'  
GLYR1-FWD         5'-GCCTGGATCAAAGTGGAAACA-3'  
GLYR1-REV         5'-CTAGACTCCGGGATGGTGAG-3'  
CHEK1-FWD         5'-GACTGGGACTTGGTGCAAAC-3'  
CHEK1-REV         5'-TGCCATGAGTTGATGGAAGA-3'  
SMN2-FWD         5'-CCTCCCATATGTCCAGATTCTC-3'  
SMN2-REV         5'-GTGGTGTCAATTTAGTGCTGCTC-3'  
DOM3Z-FWD         5'-ATAGTGACGTGGCGGGGGCA-3'  
DOM3Z-REV         5'-GAGAAGAGCAGAGGGTGGCTTC-3'  
ESYT2-FWD         5'-TCAAAGCTGACAAAGACCAAGC-3'  
ESYT2-REV         5'-TGGACAACAGGATTTGGGTTGC-3'  
ITGB3BP-FWD       5'-AACAAAACTGTTTGAAAAGAGTACAGG-3'  
ITGB3BP-REV       5'-AAAATGGCTTTAAGGAATTCATAGCTGT-3'  
NAP1L4-FWD        5'-CGAGGAGGGAGAAGACGAGGAT-3'  
NAP1L4-REV        5'-GAAGTCCAGAGCTACAGGCAC-3'  
RBM41-FWD         5'-TTTCAGGGAGCTGATCGTCACT-3'  
RBM41-REV         5'-AGATCTCTTTCAGTCACCCGAGG-3'  
SPTAN1-FWD        5'-GGTGGAAAGTGGAAAGTGAACGA-3'  
SPTAN1-REV        5'-AACCTGCTCCAAGTCTGCTCC-3'



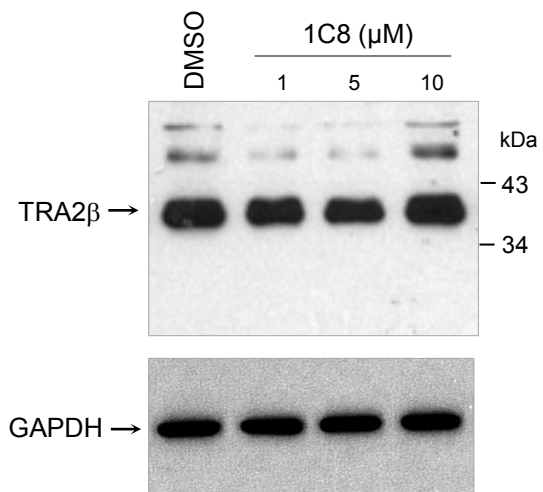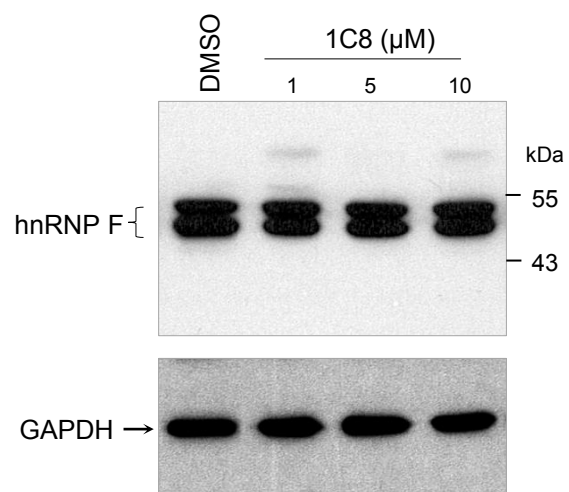

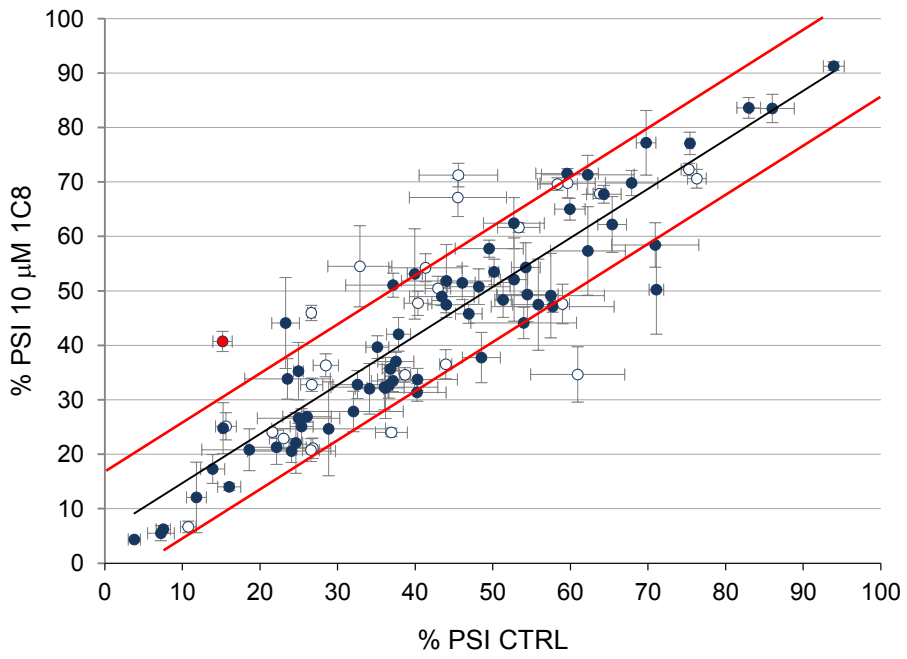

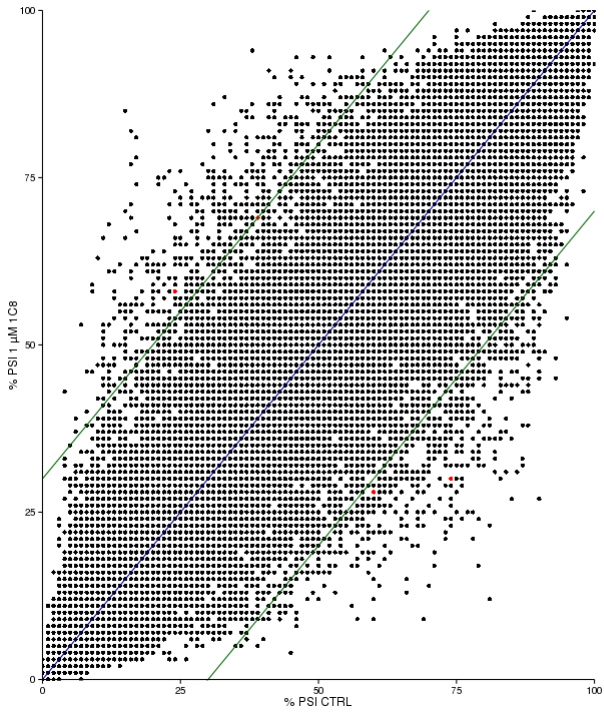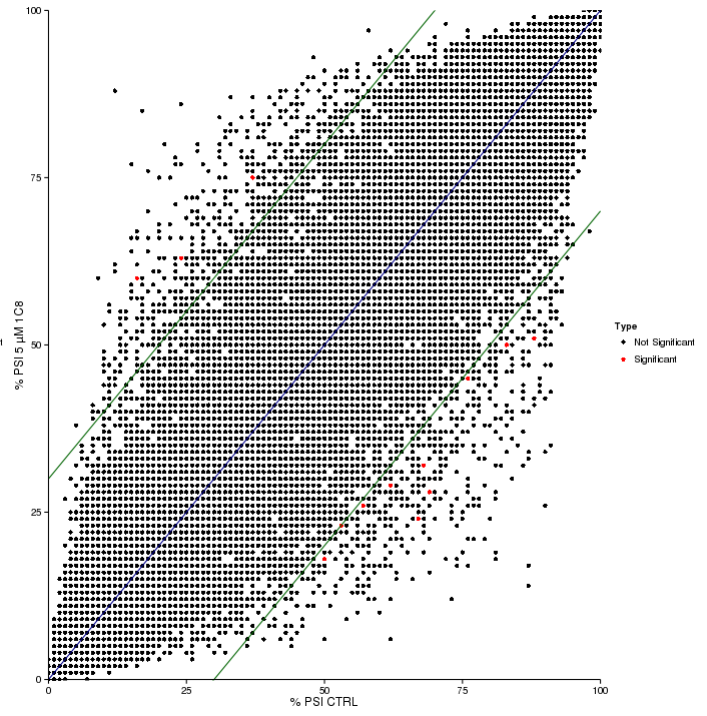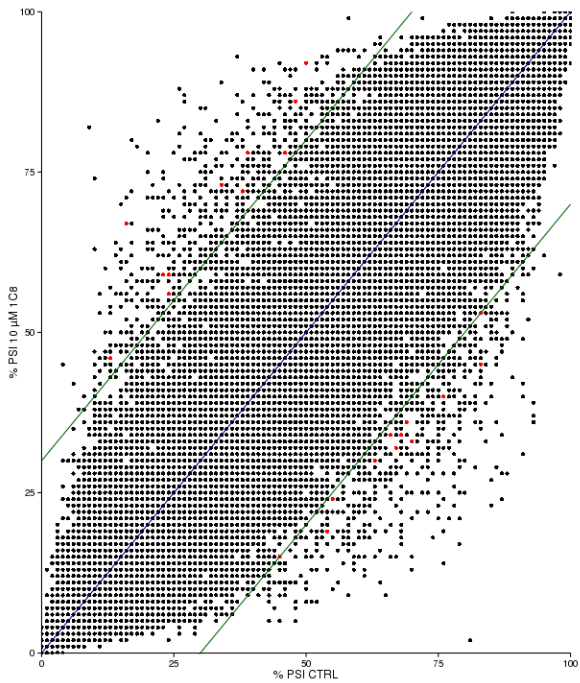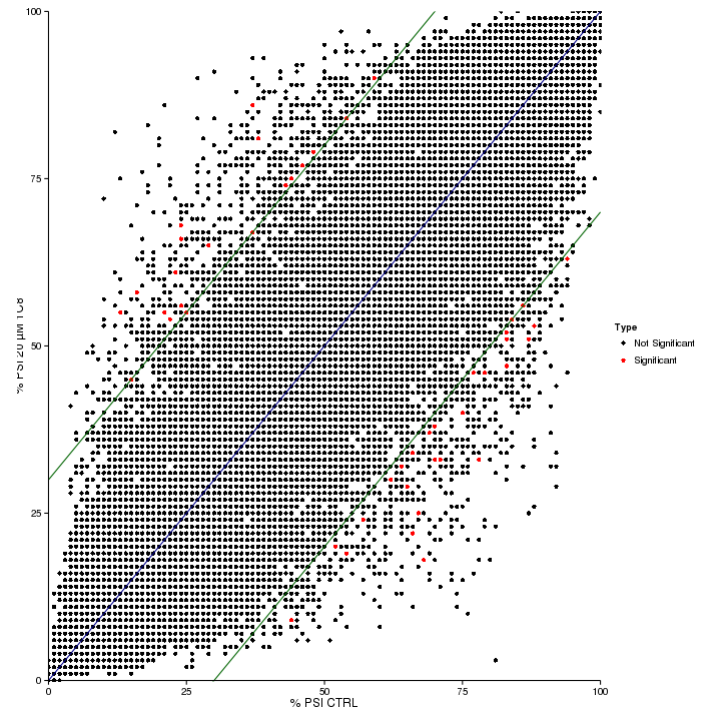

Supplementary Figure S4

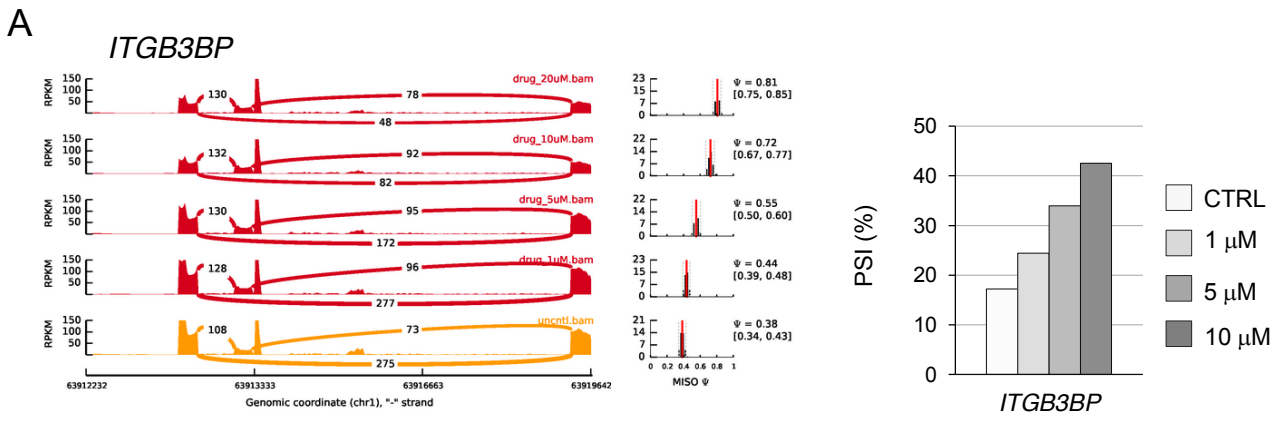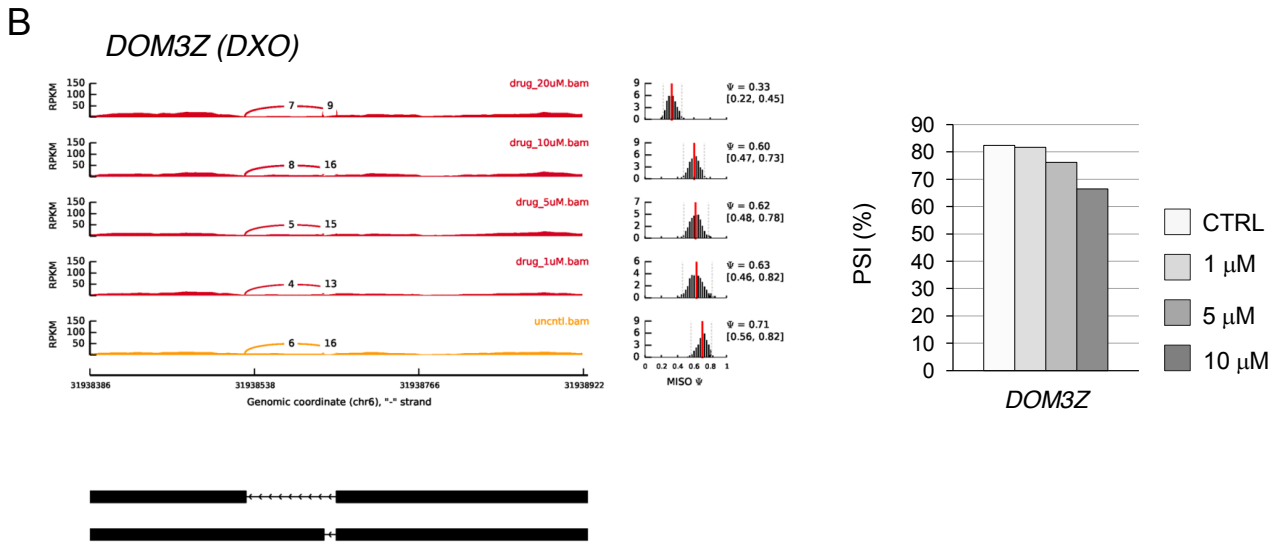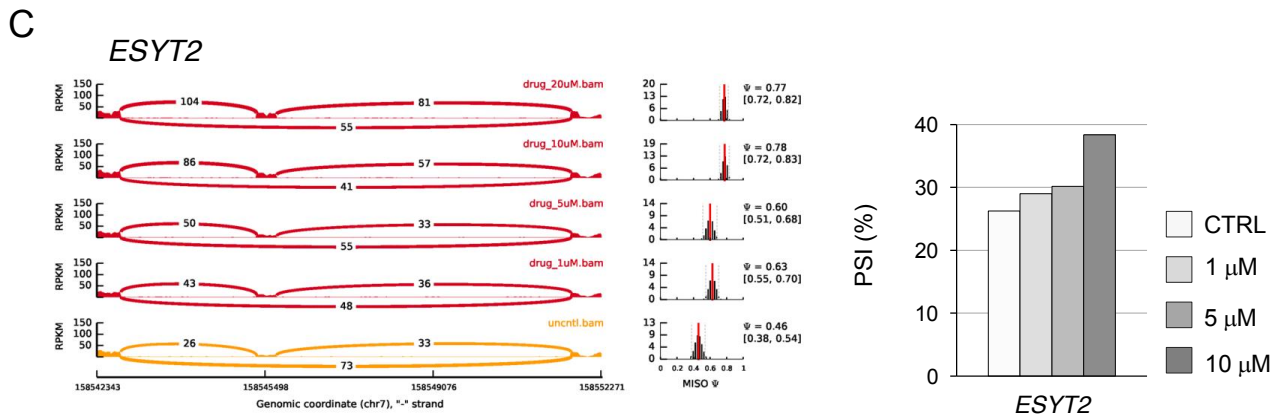



D

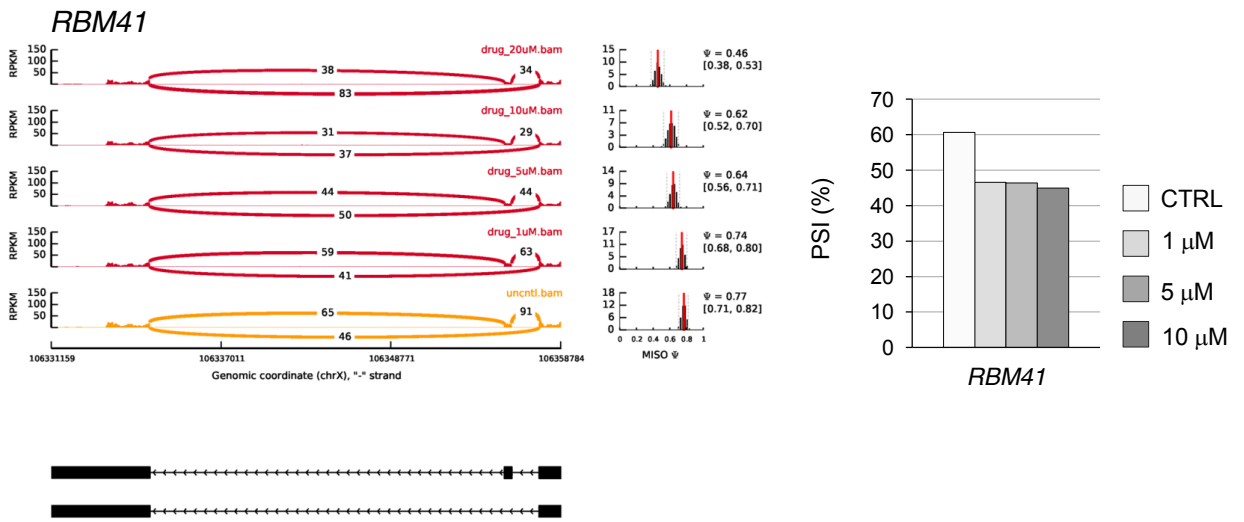

E

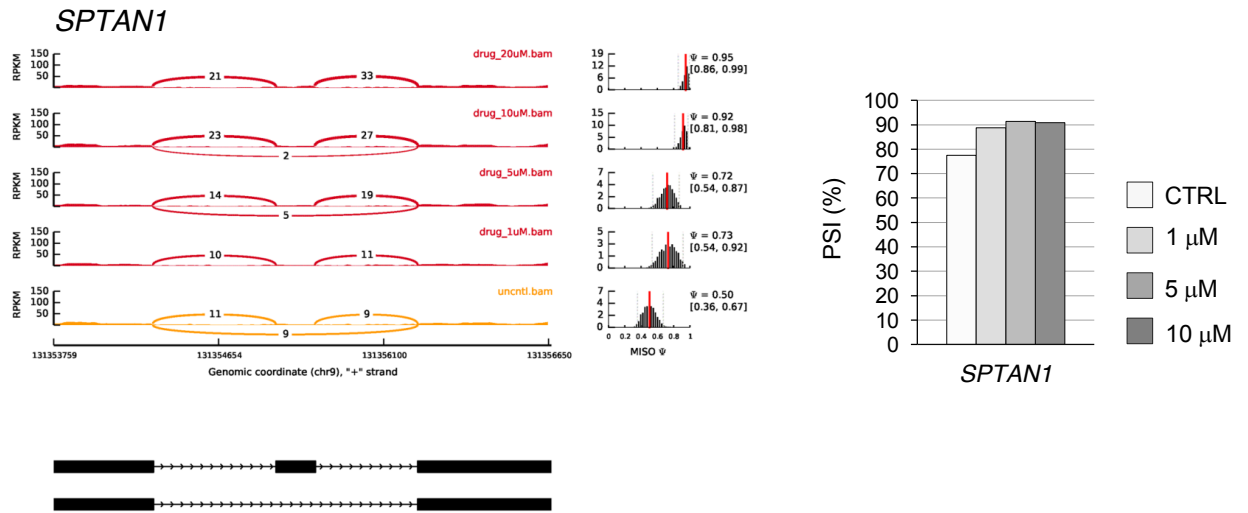

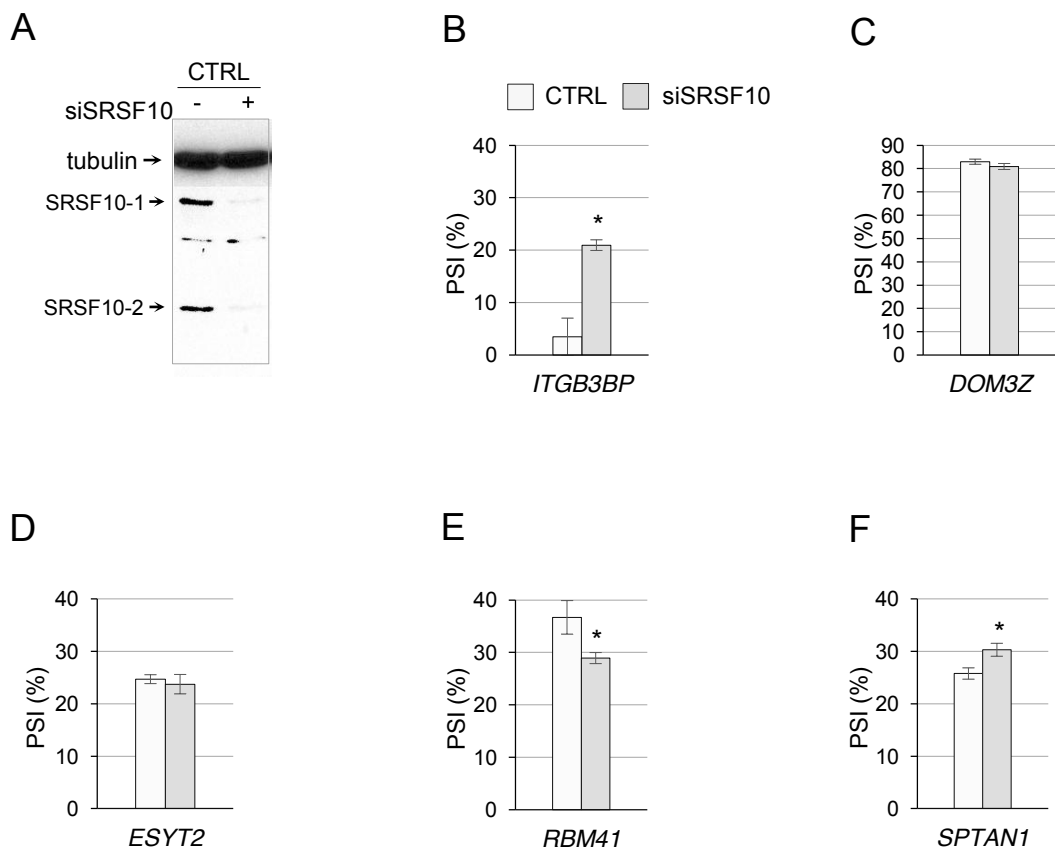

A

Differential Expression of mRNA in drug\_1uM

• Upregulated • Unchanged • Downregulated

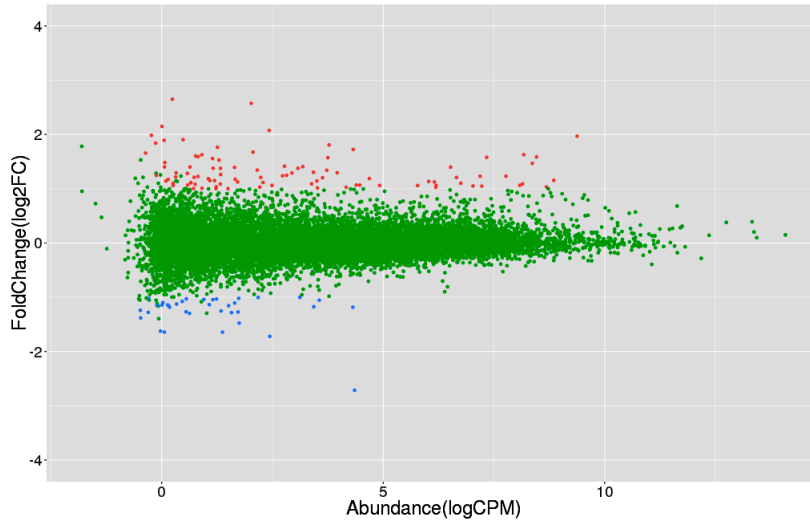

B

Differential Expression of mRNA in drug\_5uM

• Upregulated • Unchanged • Downregulated

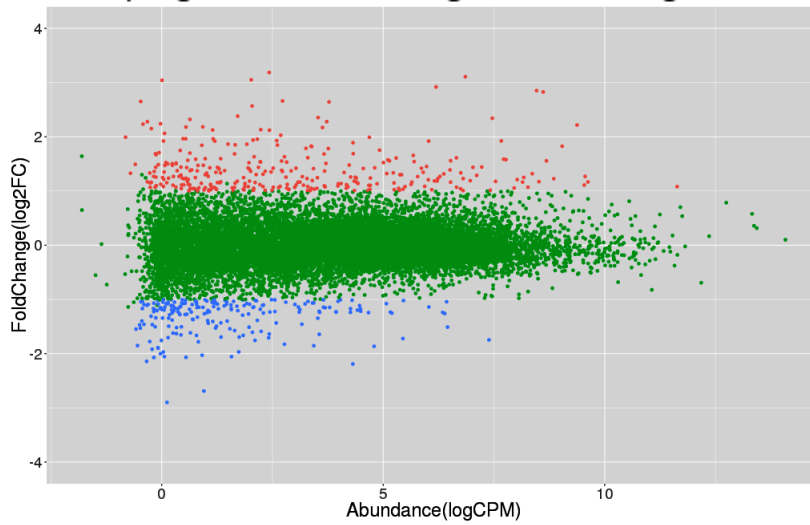

C

Differential Expression of mRNA in drug\_10uM

• Upregulated • Unchanged • Downregulated

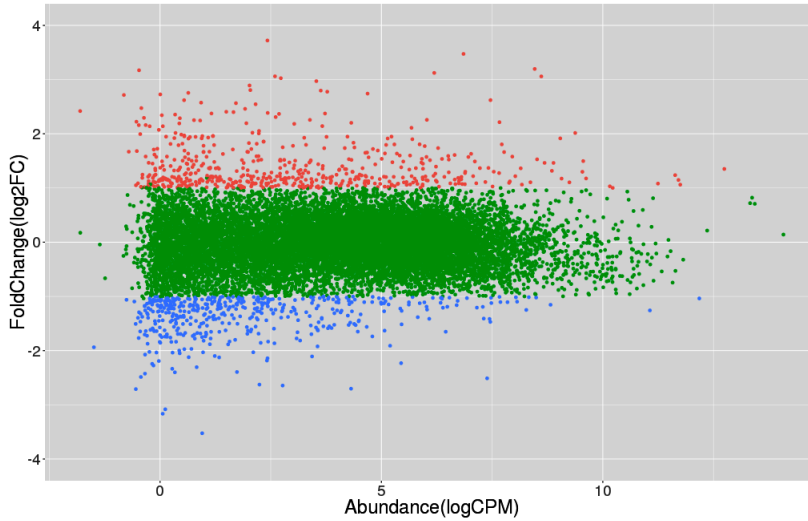

D

Differential Expression of mRNA in drug\_20uM

• Upregulated • Unchanged • Downregulated

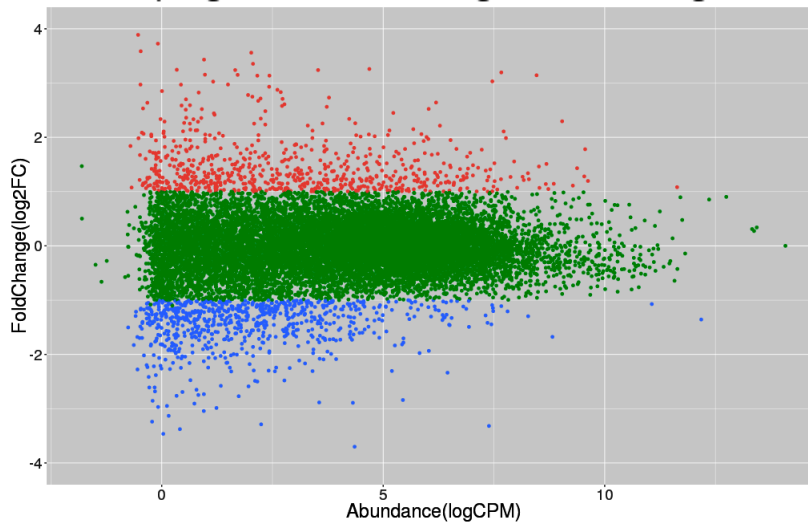

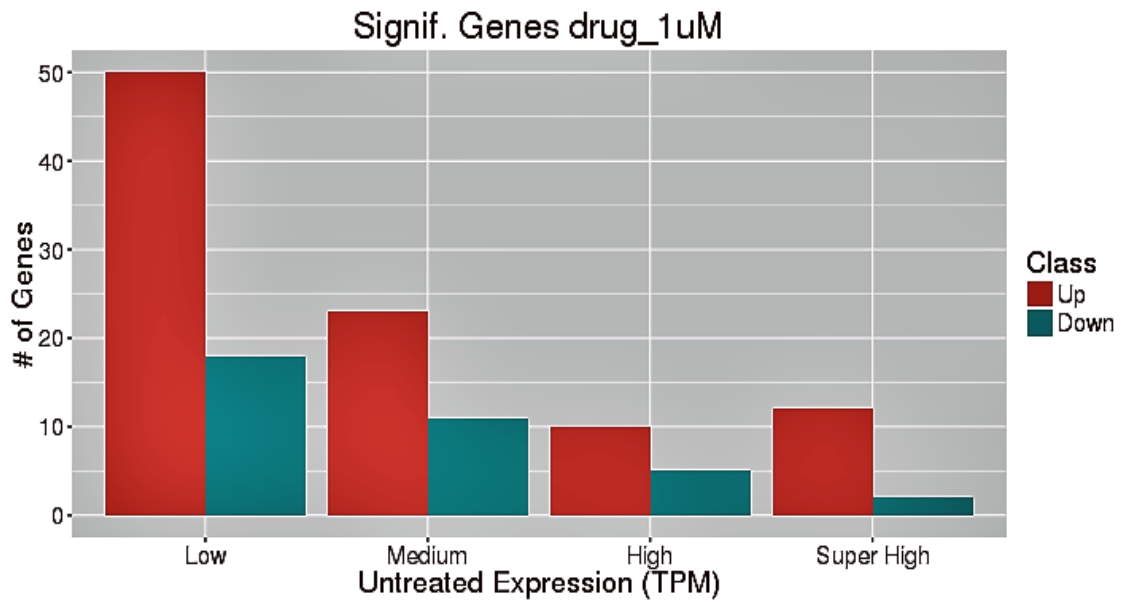

Supplement: gkw1223_Supp.pdf [file gkw1223_Supp.pdf]
